# Supplementary material for: Optical functionalization of human Class A orphan G-protein-coupled receptors
Source: PubMed Central journal article supplement (PMC5956105; doi:10.1038/s41467-018-04342-1), 2018-05-16
Supplement: 41467_2018_4342_MOESM1_ESM.pdf [file 41467_2018_4342_MOESM1_ESM.pdf]

# **Optical functionalization of human Class A orphan G-protein coupled receptors**

**Morri et al.**

**This PDF file includes:**

Supplementary Figures 1 to 8

Supplementary Tables 1 to 9

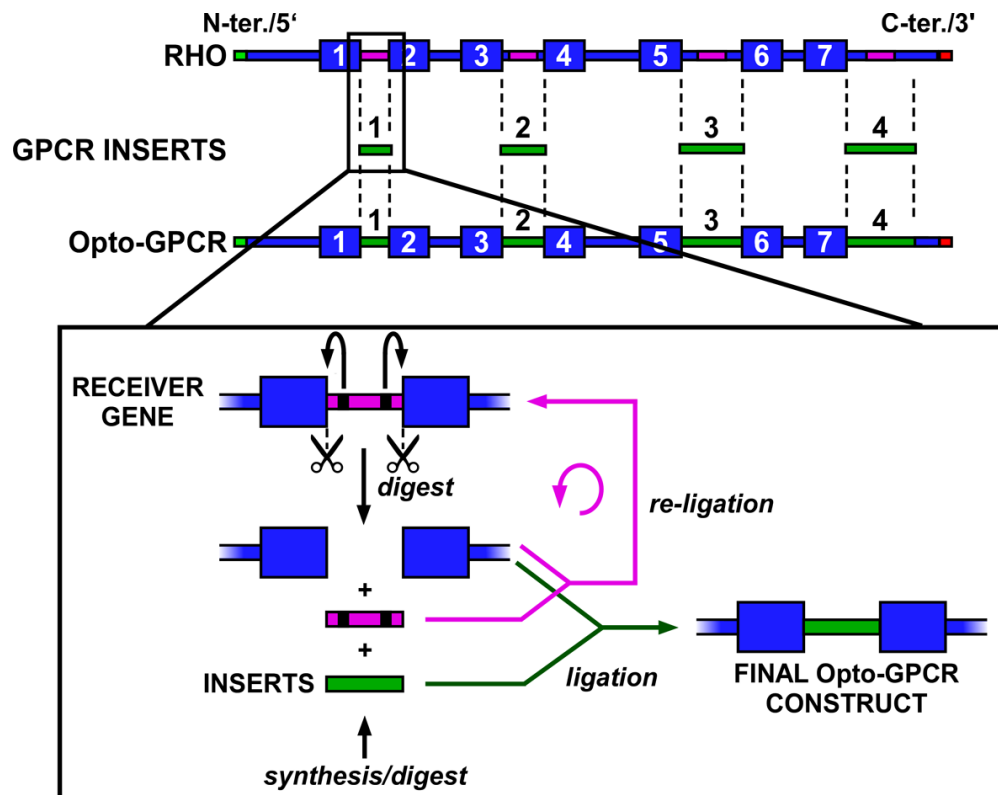

**Supplementary Figure 1. High-throughput cloning strategy.** The strategy is a modified form of Golden Gate cloning<sup>1</sup>. A rhodopsin (RHO) receiver gene harbors a non-coding genetic element (pink) at each intracellular element insertion site. These non-coding elements contain two recognition sites (black) for a *TypellS* restriction enzyme. Enzymes were *BsaI* (site 1: ICL1), *BsmBI* (site 2: ICL2), *BpiI/BbsI* (site 3: ICL3), and *LguI/SapI* (site 4: C-terminus). The recognition sites are oriented in opposite direction (black arrows) to achieve excision of the non-coding element during digest (scissors). After excision and when combined with coding inserts that were obtained by synthesis/digest, the receiver vector can either undergo religation with the non-coding genetic element (pink arrows, yields original receiver vector that will be redigested) or ligation with the inserts (green arrows, yields final construct that is not digested because no recognition sites are present). Temperature cycling allows obtaining high ratios of final construct to receiver gene (>9:1) and the reaction is in one tube with simultaneous ligation. Not shown are sticky end overhangs, VSV-G epitope at N-terminus (light green), and 1D4-epitope of rhodopsin at the C-terminus before the stop codon (red). Refer to **Supplementary Table 4** for detailed sequence design and **Supplementary Table 6** for reaction performance.

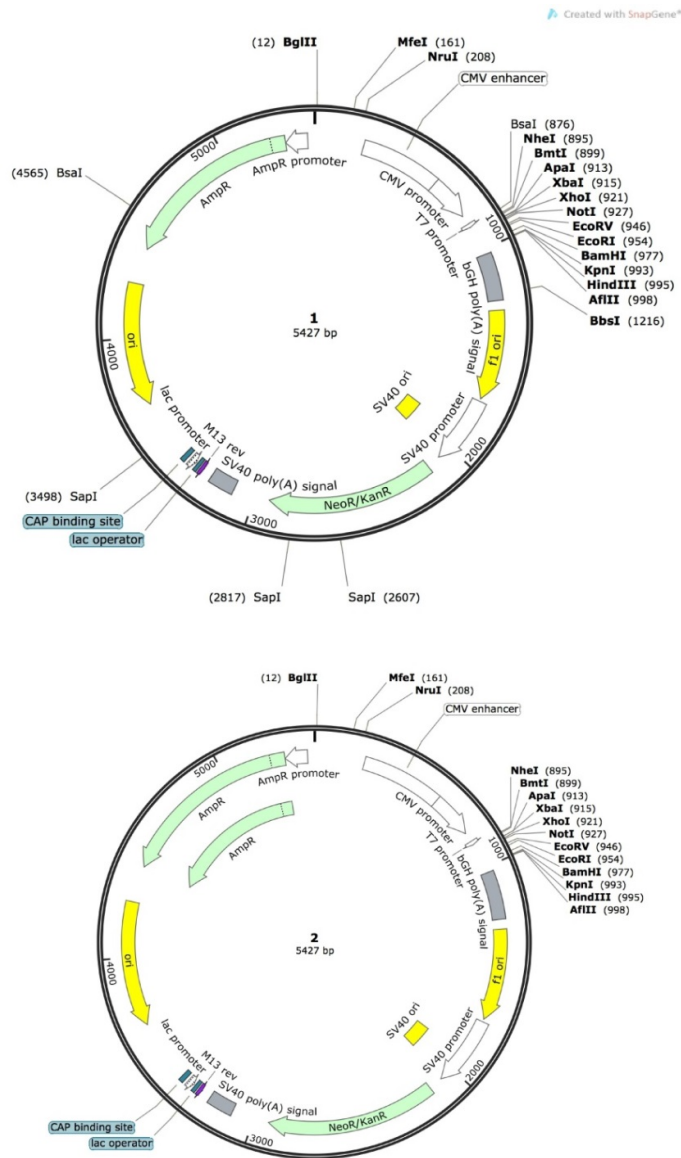

**Supplementary Figure 2. Modified mammalian expression vector.** (1) Map of the original pcDNA3.1(-) vector with six recognition sites of the Type IIS restriction enzymes BsaI, BpiI/BbsI, and LglI/SapI. (2) Modified vector termed pcDNA3.1(-)- $\Delta$ REIIS after removal of all six sites using site-directed mutagenesis. Refer to **Supplementary Table 5** for vector sequence. The modified vector is available through Addgene.org.

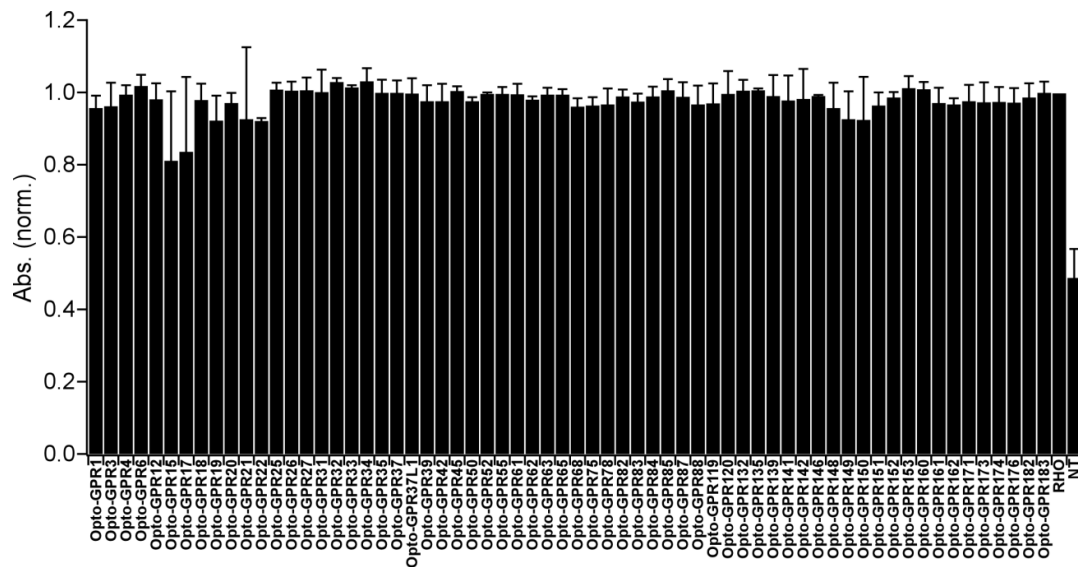

**Supplementary Figure 3. Expression of chimeric receptors.** Absorbance values from HEK293 cells transfected with chimeric receptors detected using an antibody directed against the extracellular N-terminal VSV-G epitope. Mean absorbance values (normalized to epitope-tagged rhodopsin (RHO))  $\pm$  s.d. (3 independent experiments) are shown. NT: Not transfected.

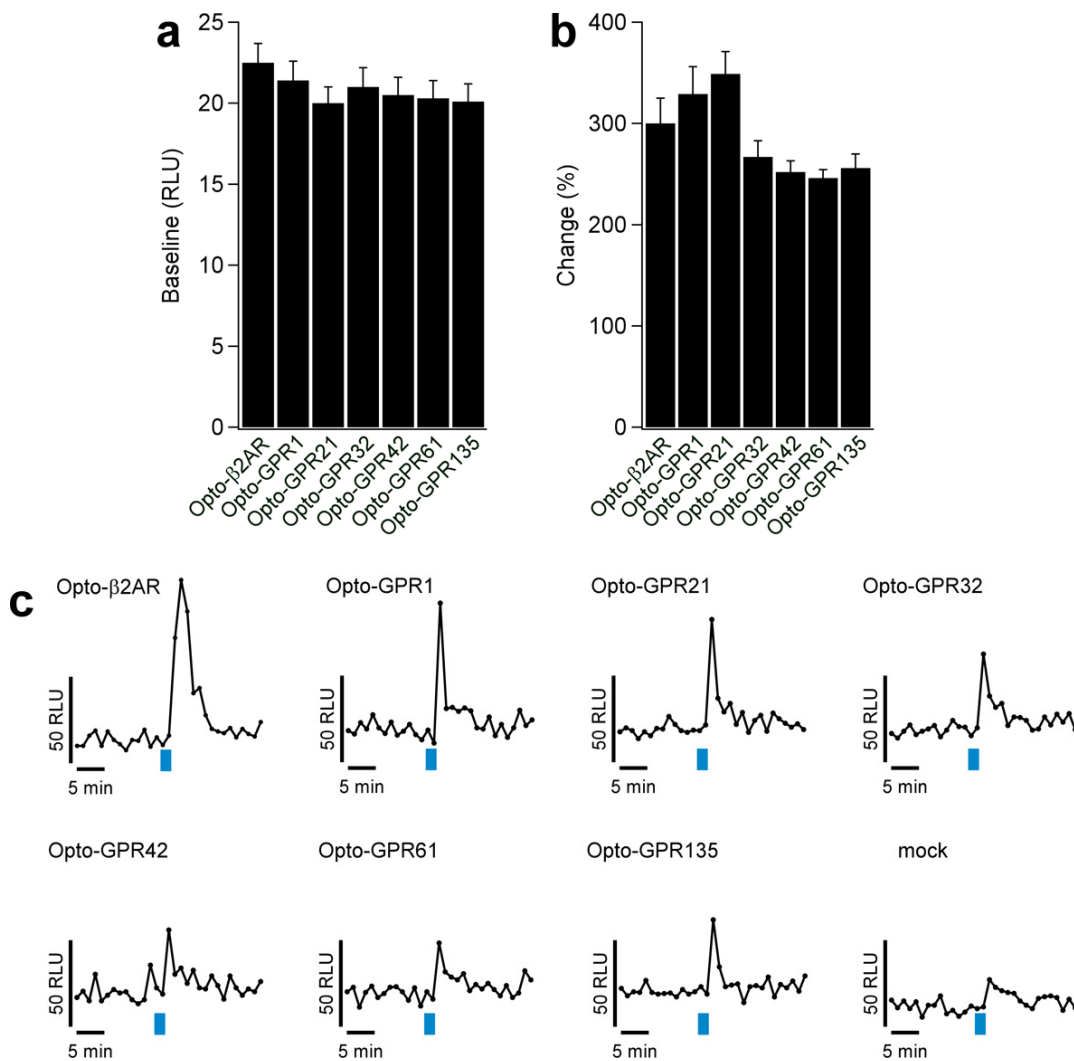

**Supplementary Figure 4. Light-induced cAMP mobilization.** (a and b) Baseline RLU (a) and relative responses upon light stimulation (b) of HEK293 cells transfected with chimeric receptors and a real-time sensor for intracellular cAMP. Mean RLU values  $\pm$  s.e.m. (n=13-15 wells, 5 independent experiments) are shown. (c) Representative raw data traces (average traces of triplicate wells from the same experiment; blue bars indicate light stimulation).

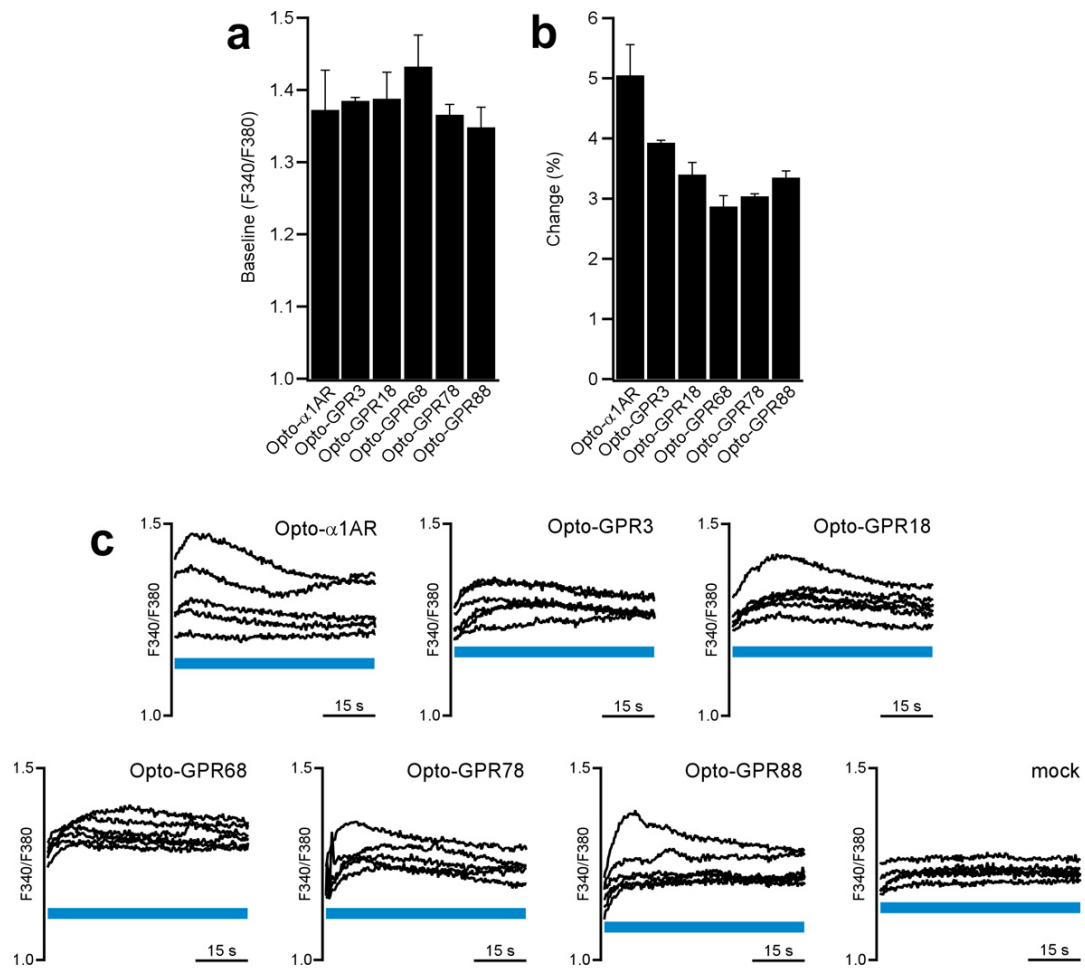

**Supplementary Figure 5. Light-induced  $\text{Ca}^{2+}$  mobilization.** (a and b) Baseline F340/F380 ratios (a) and relative responses upon light stimulation (b) of HEK293 cells transfected with chimeric receptors and labelled with a  $\text{Ca}^{2+}$ -sensitive dye (Fura2). Mean values  $\pm$  s.d. (n=45-75 cells, 3-5 independent experiments) before and after stimulation are shown. (c) Representative raw data traces (5 individual cells; light was applied throughout the traces).

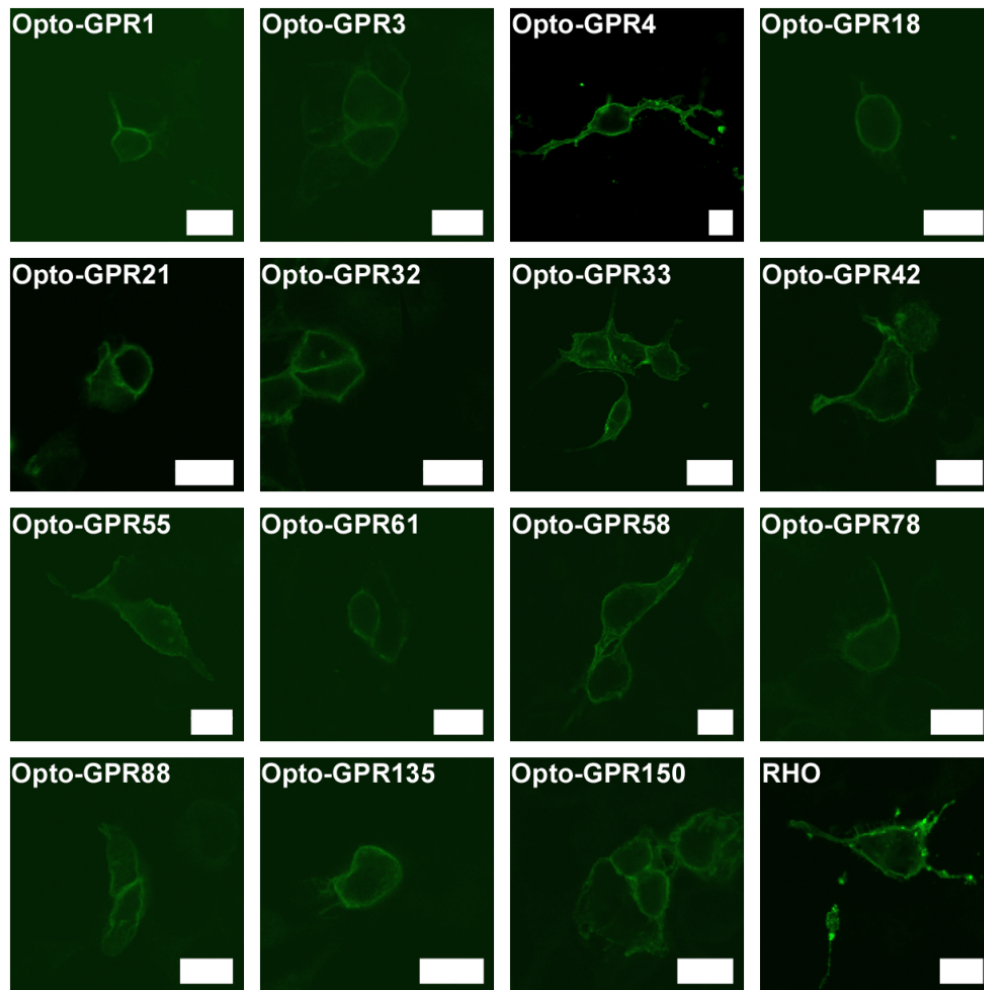

**Supplementary Figure 6. Surface localization of chimeric receptors.** Confocal microscopy images of HEK293 cells expressing chimeric receptors with induction or reduction of CRE, SRE-.L and SRE reporters detected using an antibody directed against the extracellular N-terminal VSV-G epitope. Scale bars are 10  $\mu$ m.

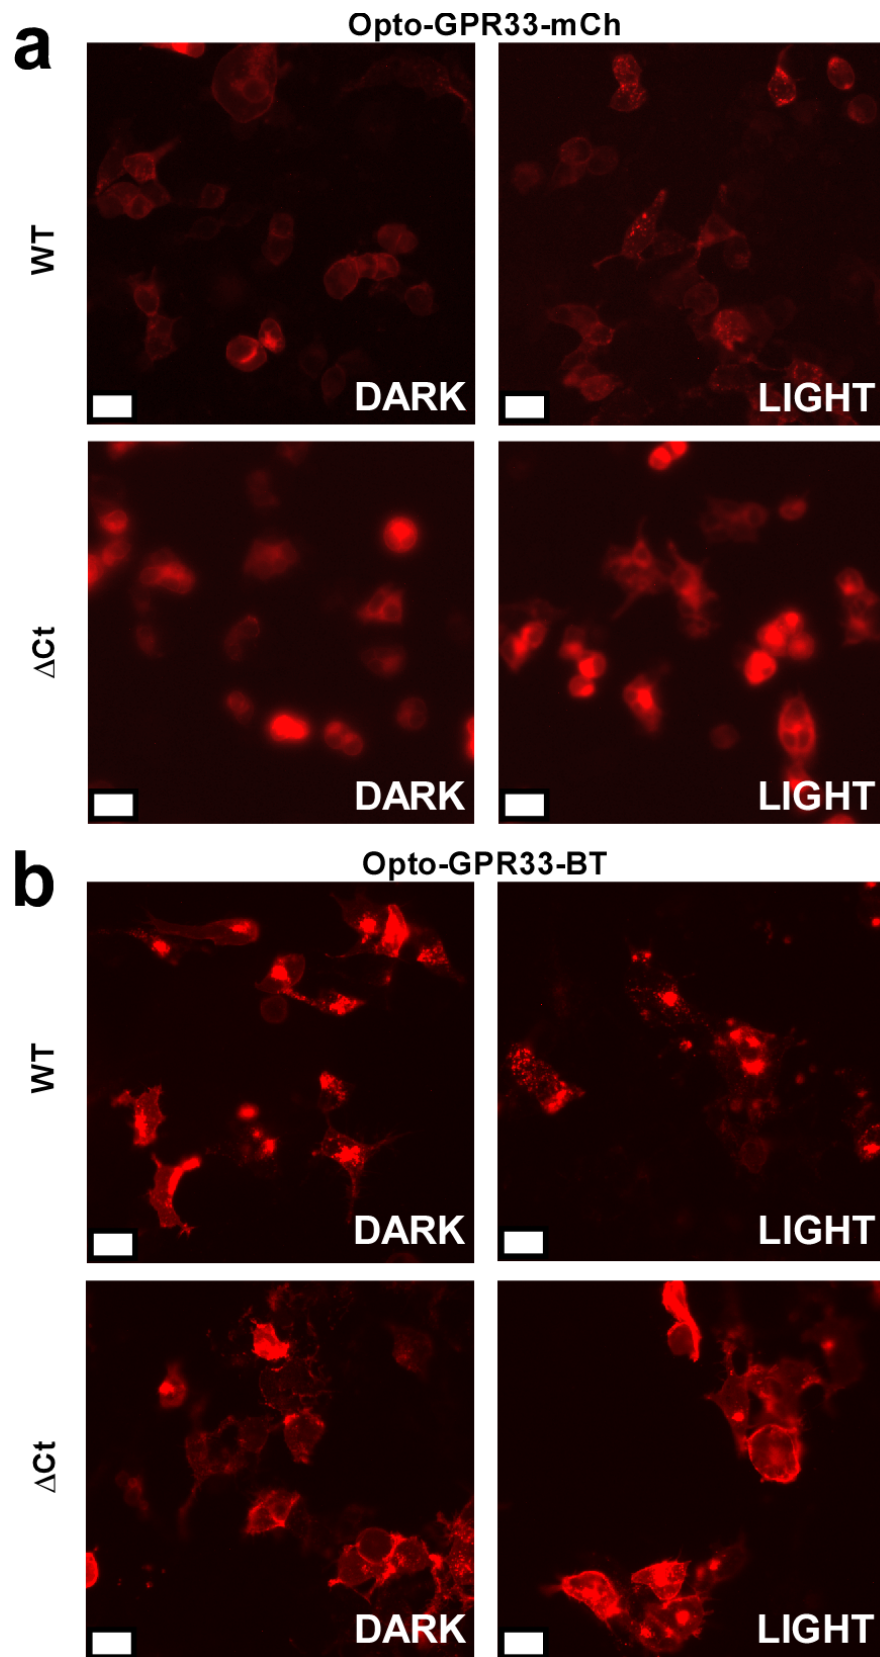

Supplementary Figure 7. Internalization of Opto-GPR33( $\Delta$ Ct) detected as mCherry (mCh) fusion proteins (a) or by labelling of biotinylated receptors with fluorescent streptavidin (b).

Scale bars are 10  $\mu$ m.



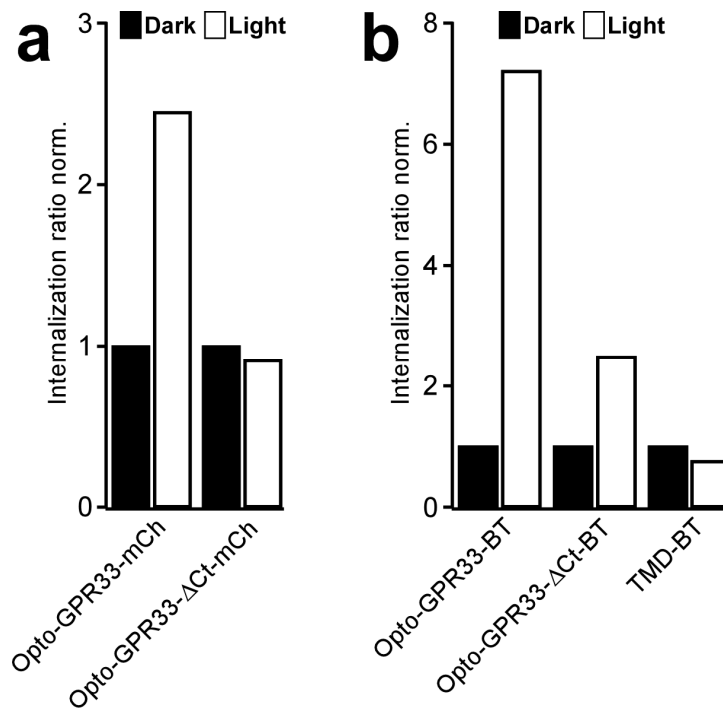

**Supplementary Figure 8. Analysis of images shown in Supplementary Fig. 7.** Internalization ratios are defined as the number of cells with internalized receptors divided by the number of cells without internalized receptors (see **Methods**). Mean ratios (n=3-6 wells) are shown.

**Supplementary Table 1. Reference GPCRs.**

| Receptor                                                                                                                                                                                                                                                                                                            | Species | Predom. G <sub>α</sub> coupling <sup>a)</sup> | Expression vector | Source <sup>c)</sup>                               |
|---------------------------------------------------------------------------------------------------------------------------------------------------------------------------------------------------------------------------------------------------------------------------------------------------------------------|---------|-----------------------------------------------|-------------------|----------------------------------------------------|
| β2 adrenergic receptor (β2AR)                                                                                                                                                                                                                                                                                       | Human   | G <sub>αs</sub>                               | pcDNA3            | Robert Lefkowitz (Duke Univ.) via Addgene, (14697) |
| α1 adrenergic receptor (α1AR)                                                                                                                                                                                                                                                                                       | Rat     | G <sub>αq</sub>                               | pCMV5             | Robert Lefkowitz (Duke Univ.) via Addgene, (45760) |
| Free fatty acid receptor 3 (FFR3)                                                                                                                                                                                                                                                                                   | Human   | G <sub>αio</sub> and G <sub>αq</sub>          | pcDNA3            | Graeme Milligan (Univ. of Glasgow)                 |
| Adenosine A2A receptor (A2AR)                                                                                                                                                                                                                                                                                       | Human   | G <sub>αs</sub>                               | N/A <sup>b)</sup> | N/A                                                |
| Dopamine receptor D1 (D1R)                                                                                                                                                                                                                                                                                          | Human   | G <sub>αs</sub>                               | pcDNA3.1          | MGC (202856822)                                    |
| Dopamine receptor D2 (D2R)                                                                                                                                                                                                                                                                                          | Human   | G <sub>αio</sub>                              | pcDNA3.1          | MGC (202830262)                                    |
| Muscarinic acetylcholine receptor M1 (M1R)                                                                                                                                                                                                                                                                          | Human   | G <sub>αq</sub> and G <sub>αs</sub>           | pcDNA3.1          | Klaus Groschner (Med. Univ. of Graz)               |
| Muscarinic acetylcholine receptor M2 (M2R)                                                                                                                                                                                                                                                                          | Human   | G <sub>αio</sub>                              | pcDNA3.1          | MGC (211689788)                                    |
| Muscarinic acetylcholine receptor M3 (M3R)                                                                                                                                                                                                                                                                          | Human   | G <sub>αq</sub>                               | N/A <sup>b)</sup> | N/A                                                |
| <sup>a)</sup> G <sub>α</sub> -coupling as retrieved from literature.<br><sup>b)</sup> N/A: HEK293 cells endogenously express adenosine receptors (A2A/BR) and muscarinic acetylcholine receptors (M3R) <sup>2</sup> .<br><sup>c)</sup> MGC: Mammalian Gene Collection clones obtained from GE Healthcare Dharmacon. |         |                                               |                   |                                                    |

**Supplementary Table 2. Ligands used to activate reference GPCRs.**

| Receptor(s)                 | Ligand (agonists unless noted otherwise)  | Stock solvent | Stock concentration | Final concentration        |
|-----------------------------|-------------------------------------------|---------------|---------------------|----------------------------|
| $\alpha$ 1AR<br>$\beta$ 2AR | Norepinephrine                            | DMSO          | 19 mM               | 10 $\mu$ M <sup>3</sup>    |
| FFR3                        | Propionate                                | water         | 2 M                 | 10 mM <sup>4</sup>         |
| A2AR                        | 5'-(N-ethylcarboxamido) adenosine         | DMSO          | 80 mM               | 100 $\mu$ M <sup>5</sup>   |
| D1R<br>D2R                  | Dopamine                                  | DMSO          | 100 mM              | 100 $\mu$ M <sup>6,7</sup> |
| M2R<br>M3R                  | Muscarine                                 | DMSO          | 24 mM               | 100 $\mu$ M <sup>8,9</sup> |
| M1R                         | VU357017 (positive, allosteric modulator) | DMSO          | 5 mM                | 25 $\mu$ M <sup>10</sup>   |

**Supplementary Table 3. Receptors listed by IUPHAR and included in this study. See Methods for gene selection and curation.**

| Gene name | SwissProt/Uniprot identifier |
|-----------|------------------------------|
| GPR1      | P46091                       |
| GPR3      | P46089                       |
| GPR4      | P46093                       |
| GPR6      | P46095                       |
| GPR12     | P47775                       |
| GPR15     | P49685                       |
| GPR17     | Q13304                       |
| GPR18     | Q14330                       |
| GPR19     | Q15760 <sup>a)</sup>         |
| GPR20     | Q99678                       |
| GPR21     | Q99679                       |
| GPR22     | Q99680                       |
| GPR25     | O00155                       |
| GPR26     | Q8NDV2                       |
| GPR27     | Q9NS67                       |
| GPR31     | O00270                       |
| GPR32     | O75388                       |
| GPR33     | Q49SQ1                       |
| GPR34     | Q9UPC5                       |
| GPR35     | Q9HC97                       |
| GPR37     | O15354                       |
| GPR37L1   | O60883                       |
| GPR39     | O43194                       |
| GPR42     | O15529 <sup>a)</sup>         |
| GPR45     | Q9Y5Y3                       |
| GPR50     | Q13585                       |
| GPR52     | Q9Y2T5                       |
| GPR55     | Q9Y2T6                       |
| GPR61     | Q9BZJ8                       |
| GPR62     | Q9BZJ7                       |
| GPR63     | Q9BZJ6                       |
| GPR65     | Q8IYL9                       |
| GPR68     | Q15743                       |
| GPR75     | O95800                       |
| GPR78     | Q96P69                       |
| GPR82     | Q96P67                       |
| GPR83     | Q9NYM4                       |
| GPR84     | Q9NQS5                       |

|                                                                                                                                          |        |
|------------------------------------------------------------------------------------------------------------------------------------------|--------|
| GPR85                                                                                                                                    | P60893 |
| GPR87                                                                                                                                    | Q9BY21 |
| GPR88                                                                                                                                    | Q9GZN0 |
| GPR119                                                                                                                                   | Q8TDV5 |
| GPR120                                                                                                                                   | Q5NUL3 |
| GPR132                                                                                                                                   | Q9UNW8 |
| GPR135                                                                                                                                   | Q8IZ08 |
| GPR139                                                                                                                                   | Q6DWJ6 |
| GPR141                                                                                                                                   | Q7Z602 |
| GPR142                                                                                                                                   | Q7Z601 |
| GPR146                                                                                                                                   | Q96CH1 |
| GPR148                                                                                                                                   | Q8TDV2 |
| GPR149                                                                                                                                   | Q86SP6 |
| GPR150                                                                                                                                   | Q8NGU9 |
| GPR151                                                                                                                                   | Q8TDV0 |
| GPR152                                                                                                                                   | Q8TDT2 |
| GPR153                                                                                                                                   | Q6NV75 |
| GPR160                                                                                                                                   | Q9UJ42 |
| GPR161                                                                                                                                   | Q8N6U8 |
| GPR162                                                                                                                                   | Q16538 |
| GPR171                                                                                                                                   | O14626 |
| GPR173                                                                                                                                   | Q9NS66 |
| GPR174                                                                                                                                   | Q9BXC1 |
| GPR176                                                                                                                                   | Q14439 |
| GPR182                                                                                                                                   | O15218 |
| GPR183                                                                                                                                   | P32249 |
| <sup>a)</sup> Since the start of this study, two SwissProt/Uniprot sequences changed in the repository at a single amino acid site each. |        |

**Supplementary Table 4. Design of receiver gene and inserts (here, for GPR1 as an example) for high-throughput cloning.** Color coding of receiver gene corresponds to that of **Supplementary Fig. 1** and is further described below. Double-stranded inserts (green) can be obtained either by annealing oligonucleotides with sticky ends (e.g. 5'-**CGTCACGGGGTTCAAGTGAAGAAAACAGTC**-3' and 5'-**TGAGGACTGTTTTCTTCCACTTGAACCCCGT**-3' for GPR1\_insert\_1) or from a vector with orthogonal antibiotics resistance (e.g. 5'-**GCTCTTCACGCGCT...CAAACAAGAAGAGC**-3' for GPR1\_insert\_4).

```

>receiver_gene
ACCATGAAAAACGATCATCGCCCTGAGCTACATCTTCTGCCTGGTATTTCGCCATGTACACCGATATAGAGATGAACAGGCTGGGAAAGGATAGCCTCATGAACGGGACCGAGGGCCCAAACCTTCTACGTGCCTTTCTCCAACA
AGACGGGCGTGGTGGCGCAGCCCTTCGAGGCCCGCAGTACTACCTGGCGGAGCCATGGCAGTTCTCCATGCTGGCCGCTACATGTTCTGCTGATCATGCTTGGCTTCCCATCAACTTCTCAGGCTGTACGTCAGAGA
CCAGTCCAGCAACCGGTCAAGAAGCTGGTCTCTCTCAACTACATCCTGCTCAACCTGGCCGTGGCCGACCTTTCATGGTGTTCGGGGGCTTACCACCACCTTCTACACTCTCTGCACGGTACTTCGTCTTTGGCC
CAGGGCTGCAACCTGGAGGGCTTCTTTGCCACCTTGGGCGGTGAAATTGCACGTGTTGCTTGGTCTTGGCCATCGAGCGGTACGTGGTGGTGAGACGSCAAGCCCATGCTAAGCGAGCAACTTCCCGTCTCGGCC
ATCATGGGCGTCCCTTCACCTGGGTGATGGCTCTGGCCTGTGCCGCGCCCCCTCGTCCGCTGGTCCAGGTACATCCCGGAGGGCATGCAGTGTCTGCGGGATTGACTACTACAGCCCCACGAGGAAACCAACAATG
AGTCGTTTCGTATCTACATGTTTCGTGGTCCACTTCATCATCCCCCTGATTGTTCATATTCTTCTGCTACGGACAGTCTTTCGTTGGTGTGATATCCACCGTCAAGGGAAGACAGCGCATGGTGATCATCATGGTCATCGCTTT
CCTAATCTGCTGGTGCCTTACGCTGGGTGGCCTTCTACATCTTACCCATCAGGGCTCTGACTTTGGCCCATCTTCATGACCATCCCGGCTTTCTTTGCCAAGACTTCTGCCGTCTACAACCCCGTATCTACATCATG
ATGAACAAGCAGTTCGNGAAGAGCACTGCATGGTCCGGCCGCCACCACTCTCGCTCTTACAGAAACCAGCCAAGTGGCGCCTGCCATAA

>GPR1_insert_1 (ICL1)
CGTCACGGGGTTCAAGTGAAGAAAACAGTCCTCA

>GPR1_insert_2 (ICL2)
GGTGATCCATCCTGTCTTATCTCATCGGCATCGAACCTCAAGAAGGCCA

>GPR1_insert_3 (ICL3)
CGGATGTCTCATCTTCAAGGTGAAGAAGCGAAGCATCTGATCTCCAGTAGGCATTTCCGCA

>GPR1_insert_4 (C-terminus)
CGCGCTCGCTCCGGTCCAGTTGCTGAGATACTCAAGTACACACTGTGGGAAGTCAGTGTCTTGGCACAGTGAGTGAACAGCTCAGGAACTCAGAAACCAAGAATCTGTGTCTCTGGAAACAGCTCAACA

```

>final\_assembled\_gene\_Opto-GPR1

```
ACCATGAAAACGATCATCGCCCTGAGCTACATCTTCTGCCTGGTATTGCCCATGTACACCGATATAGAGATGAACAGGCTGGGAAAGGATAGCCTCATGAACGGGACCGAGGGCCAAACTTCTACGTGCCTTTCTCCAACA  
AGACGGGCGTGGTGGCGCAGCCCTTCGAGGCCCGCAGTACTACCTGGCGGAGCCATGGCAGTTCTCCATGCTGGCCGCTACATGTTCTCTGCTGATCATGCTTGGCTTCCCATCAACTTCTCACGCTGTA CGTCACGGG  
GTTCAAGTGAAGAAAACAGTCTCAACTACATCCTGCTCAACCTGGCCGTGGCCGACCTCTTCATGGTGTTCGGGGGCTTCACCACCACCTCTACACCTCTCTGCACGGGTACTTCGCTTTTGGGCCACGGGCTGCAAC  
CTGGAGGGCTTCTTTGCCACCTGGGCGGTGAAATGCACTGTGGTCTTGGTGGTCTGGCCATCGAGCGGTACGTGGTGGTGATCCATCCTGTCTTATCTCATCGGCATCGAACCTCAAGAAGGCCATCATGGGCGTGG  
CCTTACCTGGGTATGGCTCTGGCCTGTGCCGCGCCCCCTCGTCGGCTGGTCCAGGTACATCCCGAGGGCATGCAGTGTCTGTCGGGATTGACTACTACAGCCCCAGAGGAAACCAACAATGAGTGGTTCGTCAT  
CTACATGTTCTGGTCCACTTCATCATCCCCCTGATTGTTCATATTCTTCTGCTACGGATGTCTCATCTTCAAGGTGAAGAAGCGAAGCATCCTGATCTCCAGTAGGCATTC CGCATGGTGATCATCATGGTCATCGCTTC  
CTAATCTGCTGGCTGCCCTACGCTGGGTGGCGTTTACATCTTACCCATCAGGGCTCTGACTTTGGCCCCATCTTCATGACCATCCCGGTTTCTTTGCCAAGACTTCTGCCGTCTACAACCCCGTCATCTACATCATGA  
TGAACAAGCAGTTC CGCGCTCGCTTCCGGTCTCAGTTGCTGAGATACTCAAGTACACACTGTGGGAAGTCAGCTGTTCTGGCACAGTGAAGTGAACAGCTCAGGAAGTCAAGAAACCAAGAATCTGTGTCTCTGGAAACAG  
TCAAACA GAAACCAGCCAAGTGGCGCCTGCCTAA
```

Color code:

Kozak sequence and start codon

Signal peptide and VSV-G epitope (not shown in **Supplementary Fig. 1**)

Rhodopsin coding sequence

Insert coding sequence

Type IIs restriction sites: BsaI (ICL1), BsmBI (ICL2), BpiI/BbsI (ICL3), LguI/SapI (C-terminus)

Overhangs (not shown in **Supplementary Fig. 1**)

Additional restrictions sites: AgeI, BlnI, EcoRV, NotI (not shown in **Supplementary Fig. 1**)

N: C or T (not shown in **Supplementary Fig. 1**)

Stop codon

**Supplementary Table 5. Nucleotide sequence of modified expression vector. See Supplementary Fig. 2 for description of vector. Removed recognition sites for BsaI, BbsI and SapI restriction enzymes are highlighted in gray (two sites), dark green (one site) and light blue (three sites), resp. Red highlights point to introduced substitutions. The modified vector is available through Addgene.org.**

```
GACGGATCGGGAGATCTCCCGATCCCCTATGGTGCACCTCTCAGTACAATCTGCTCTGATGCCGCATAGTTAAGCCAGTATCTGCTCCCTGCTTGTG
TGTTGGAGGTCGCTGAGTAGTGC GCGAGCAAATTTAAGCTACAACAAGGCAAGGCTTGACCGACAATTGCATGAAGAATCTGCTTAGGGTTAGGC
GTTTTGCGCTGCTTCGCGATGTACGGGCCAGATATACGCGTTGACATTGATTATTGACTAGTTATTAATAGTAATCAATTACGGGGTCATTAGTTC
ATAGCCCATATATGGAGTTCGCGTTACATAACTTACGGTAAATGGCCCGCTGGCTGACCGCCAACGACCCCGCCATTGACGTCAATAATGA
CGTATGTTCCCATAGTAACGCCAATAGGGACTTTCCATTGACGTCAATGGGTGGAGTATTTACGGTAACTGCCCACTTGGCAGTACATCAAGTGT
ATCATATGCCAAGTACGCCCCCTATTGACGTCAATGACGGTAAATGGCCCGCTGGCATTATGCCAGTACATGACCTTATGGGACTTTCCTACTT
GGCAGTACATCTACGTATTAGTCATCGCTATTACCATGGTGTATGCGGTTTTGGCAGTACATCAATGGGCGTGGATAGCGGTTTGACTCACGGGGAT
TTCCAAGTCTCCACCCATTGACGTCAATGGGAGTTGTTTTGGCACCAAAATCAACGGGACTTTCCAAAATGTCGTAACAACTCCGCCCCATTGA
CGAAATGGGCGGTAGGCGTGTACGGTGGGAGGTCTATATAAGCAGAGCTCTCTGGCTAACTAGAGAACCACCTGCTTACTGGCTTATCGAAATTA
ATACGACTCACTATAGG GAGAC CAAGCTGGCTAGCGTTTTAAACGGGCCCTCTAGACTCGAGCGGCCCACTGTGCTGGATATCTGCAGAATCC
ACCACACTGGACTAGTGGATCCGAGCTCGGTACCAAGCTTAAGTTTAAACCGCTGATCAGCCTCGACTGTGCCTTCTAGTTGCCAGCCATCTGTGTG
TTTGCCCCCTCCCCGTGCCTTCTTGACCCTGGAAGGTGCCACTCCCCTGTCTTTCTCTAATAAAATGAGGAAATGCATCGCATTGTCTGAGTA
GGTGTCAATCTATTCTGGGGGTGGGGTGGGCAGGACAGCAAGGGGGAGGATTGG AACCAATAGCAGGCATGCTGGGGATGCGGTGGGCTCTA
TGGCTTCTGAGGCGAAAGAACCAGCTGGGGCTCTAGGGGTATCCCCACGCGCCCTGTAGCGGCGCATTAAAGCGCGGCGGTGTGGTGGTTACGC
GCAGCGTGACCGCTACACTTGCCAGCGCCCTAGCGCCCGCTCTTTCGCTTCTTCCCTTCTTCTCGCCAGGTCGCCGCTTTCCCCGTC AAG
CTCTAAATCGGGGGCTCCCTTTAGGGTCCGATTTAGTGCTTTACGGCACCTCGACCCCAAAAACCTGATTAGGGTGATGGTTCACGTAGTGGGC
CATCGCCCTGATAGACGGTTTTTTCGCCCTTTGACGTTGGAGTCCAGTCTTTAATAGTGGACTCTTGTTCAAAACCTGGAACAACACTCAACCCTA
TCTCGGTCTATTCTTTTGATTTATAAGGGATTTTGCCGATTTTCGGCCTATTGGTTAAAAAATGAGCTGATTTAACAAAAATTAACGCGAATTAAT
TCTGTGGAATGTGTGTGAGTTAGGGTGTGAAAGTCCCCAGGCTCCCCAGCAGGCAGAAGTATGCAAAGCATGCATCTCAATTAGTCAGCAACCAG
GTGTGAAAGTCCCCAGGCTCCCCAGCAGGCAGAAGTATGCAAAGCATGCATCTCAATTAGTCAGCAACCATAGTCCCGCCCTAACTCCGCCAT
CCCCCCCCTAACTCCGCCAGTTCGCCCATTTCCGCCCATGGCTGACTAATTTTTTTTATTTATGCAGAGGCCGAGGCCGCTCTGCCTCTGA
GCTATTCCAGAAGTAGTGAGGAGGCTTTTTTGAGGCGCTAGGCTTTTGCAAAAAGCTCCCGGAGCTTGATATCCATTTTCGGATCTGATCAAGA
GACAGGATGAGGATCGTTTCGCATGATTGAACAAGATGGATTGCACGCAGGTTCTCCGGCCGCTTGGGTGGAGAGGCTATTCGGCTATGACTGGGC
ACAACAGACAATCGGCTGCTCTGATGCCGCGTGTTCGGCTGTCAGCGCAGGGGCGCCCGTTCTTTTGTCAAGACCGACCTGTCCGGTGCCTT
GAATGAATGCAGGACGAGGCAGCGGGTATCGTGGCTGGCCAGACGGCGTTCCTTGCGCAGCTGTGCTCGACGTTGCTACTGAAGCGGGAAG
GGACTGGCTGCTATTGGGCGAAGTGC CGGGG CAGGATCTCCTGTCATCTCACCTTGCTCCTGCCGAGAAAGTATCCATCATGGCTGATGCAATGCG
GCGGCTGCATACGCTTGATCCGGCTACCTGCCCATTCGACCACCAAGGAAACATCGCATCGAGCGAGCACGTACTCGGATGGAAGCCGGTCTTGT
CGATCAGGATGATCTGGAC GAAGA CATCAGGGGCTCGCGCCAGCCGAACCTGTTCCGCAGGCTCAAGGCGCGCATGCCCGACGGCGAGGATCTCGT
CGTGACCCATGGCGATGCCTGCTTGCCGAATATCATGGTGGAAAATGGCCGCTTTTCTGGATTCATCGACTGTGGCCGGCTGGGTGTGGCGGACCG
CTATCAGGACATAGCGTTGGCTACCCGTGATATTGCT GAAGA CTGGCGGCGAATGGGTGACCGCTTCTCGTGCTTTACGGTATCGCCGCTCC
```



CGATTCGCAGCGCATCGCCTTCTATCGCCTTCTTGACGAGTTCTTCTGAGCGGGACTCTGGGGTTTCGAAATGACCGACCAAGCGACGCCAACCTG  
CCATCACGAGATTTTCGATTCCACCGCCGCCTTCTATGAAAGGTTGGGCTTCGGAATCGTTTTCCGGGACGCCGGCTGGATGATCCTCCAGCGCGG  
GATCTCATGTGGAGTTCTTCGCCACCCCAACTGTTTATTGCGACTTATAATGGTTACAAATAAAGCAATAGCATCACAAATTTACAAATAAA  
GCATTTTTTTTCACTGCATTCTAGTTGTGGTTTTGTCCAAACTCATCAATGTATCTTATCATGTCTGTATAACCGTCGACCTCTAGCTAGAGCTTGGCG  
TAATCATGGTCATAGCTGTTTTCTGTGTGAAATTGTTATCCGCTCACAAATCCACACAACATACGAGCCGGAAGCATAAAGTGTAAGCCTGGGGT  
GCCTAATGAGTGAGCTAACTCACATTAATTGCGTTGCGCTCACTGCCCGCTTCCAGTCGGGAAACCTGTCGTGCCAGCTGCATTAATGAATCGGC  
CAACGCGCGGGGAGAGCGGTTTTGCGTATTGGGCCTCTTTCGCTTCCGCTCACTGACTCGCTGCGCTCGGTGCTTCGGCTGCGGGAGCGGTA  
TCAGCTCACTCAAAGCGGTAATACGGTTATCCACAGAATCAGGGGATAACGCAGGAAAGAACATGTGAGCAAAAGGCCAGCAAAAGGCCAGGAAC  
CGTAAAAAGGCCGCGTTGCTGGCGTTTTTCCATAGGCTCCGCCCCCTGACGAGCATCACAAAAATCGACGCTCAAGTCAGAGGTGGCGAAACCCG  
ACAGGACTATAAAGATACCAGGCGTTTTCCCCTGGAAGCTCCCTCGTGCCTCTCCTGTTCCGACCTGCCGCTTACCGGATACCTGTCCGCCTTT  
CTCCCTTCGGGAAGCGTGGCGCTTCTCATAGCTCACGCTGTAGGTATCTCAGTTCGGTGTAGGTCGTTTCGCTCCAAGCTGGGCTGTGTGCACGAA  
CCCCCGTTCAGCCGACCGCTGCGCCTTATCCGGTAACTATCGTCTTGAGTCCAACCCGGTAAGACACGACTTATCGCCACTGGCAGCAGCCACT  
GGTAACAGGATTAGCAGAGCGAGGTATGTAGGCGGTGTACAGAGTCTTGAAGTGGTGGCCTAACTACGGCTACACTAGAAGAACAGTATTTGGT  
ATCTGCGCTCTGCTGAAGCCAGTTACCTTCGGAAAAAGAGTTGGTAGCTCTTGATCCGGCAAACAAACCACCGCTGGTAGCGGTTTTTTTTGTTTGC  
AAGCAGCAGATTACGCGCAGAAAAAAGGATCTCAAGAAGATCCTTTGATCTTTTCTACGGGGTCTGACGCTCAGTGAACGAAACTCACGTAA  
GGGATTTTGGTCATGAGATTATCAAAAAGGATCTTACCTAGATCCTTTAAATTAATAAATGAAGTTTTAAATCAATCTAAAGTATATATGAGTAA  
ACTTGGTCTGACAGTTACCAATGCTTAATCAGTGAGGCACCTATCTCAGCGATCTGTCTATTTTCGTTTCATCCATAGTTGCCTGACTCCCCGTCGTG  
TAGATAACTACGATACGGGAGGCTTACCATCTGGCCCCAGTGTGCAATGATACCGCGGACCCACGCTCACCGGCTCCAGATTTATCAGCAATA  
AACCAGCCAGCCGGAAGGGCCGAGCGCAGAAGTGGTCTGCAACTTTATCCGCTCCATCCAGTCTATTAATTGTTGCCGGGAAGCTAGAGTAAGT  
AGTTCGCCAGTTAATAGTTTGGCAACGTTGTTGCCATTGCTACAGGCATCGTGGTGTACGCTCGTTCGTTGGTATGGCTTCATTACAGTCCGGT  
TCCAACGATCAAGGCGAGTTACATGATCCCCATGTTGTGCAAAAAAGCGGTTAGCTCCTTCGGTCTCCGATCGTTGTGAGAAGTAAGTTGGCC  
GCAGTGTATCACTCATGGTTATGGCAGCACTGCATAATTCTTACTGTGTCATGCCATCCGTAAGATGCTTTTCTGTGACTGGTGAGTACTCAACC  
AAGTCATTCTGAGAATAGTGTATGCGGCGACCGAGTTGCTCTTGCCTGGCGTCAATACGGGATAATACCGGCCACATAGCAGAACTTTAAAAGTG  
CTCATCATTTGAAAACGTTCTTCGGGGCGAAAACCTCAAGGATCTTACCCTGTTGAGATCCAGTTCGATGTAACCCACTCGTGCACCCAACTGA  
TCTTCAGCATCTTTTACTTTACCAGCGTTTCTGGGTGAGCAAAAACAGGAAGGCAAAATGCCGCAAAAAGGGAATAAGGGCGACACGGAAATGT  
TGAATACTCATACTCTTCTTTTCAATATTATTGAAGCATTATCAGGGTATTGTCTCATGAGCGGATACATATTTGAATGTATTTAGAAAAAT  
AAACAAATAGGGTTCCGCGCACATTTCCCCGAAAAGTGCCACCTGACGTC

**Supplementary Table 6. Evaluation of parameters for high-throughput cloning technique.**

| Condition                | Cycles | Additional digest | Colony forming units | Positive clones |
|--------------------------|--------|-------------------|----------------------|-----------------|
| Receptor 1: GPR33        |        |                   |                      |                 |
| 1                        | 33     | Yes               | 600                  | 10/10           |
| 2                        | 33     | No                | 400                  | 10/10           |
| 3                        | 60     | Yes               | 100                  | 10/10           |
| Receptor 2: $\alpha$ 1AR |        |                   |                      |                 |
| 1                        | 33     | Yes               | 450                  | 7/10            |
| 2                        | 33     | No                | 1500                 | 3/10            |
| 3                        | 60     | Yes               | 300                  | 9/10            |

**Supplementary Table 7. Tabulated results for data shown in Fig. 3 (mean  $\pm$  s.e.m., n=6-9, 3-4 independent experiments).**

| Gene name    | CRE             |                  | SRE             |                 | SRE.L           |                   | CRE+stim.       |                 |
|--------------|-----------------|------------------|-----------------|-----------------|-----------------|-------------------|-----------------|-----------------|
|              | Dark            | Light            | Dark            | Light           | Dark            | Light             | Dark            | Light           |
| Opto-GPR1    | 1.52 $\pm$ 0.42 | 8.94 $\pm$ 3.52  | 0.52 $\pm$ 0.17 | 0.61 $\pm$ 0.22 | 0.74 $\pm$ 0.25 | 0.57 $\pm$ 0.20   | 1.39 $\pm$ 0.12 | 1.45 $\pm$ 0.26 |
| Opto-GPR3    | 0.45 $\pm$ 0.16 | 0.33 $\pm$ 0.07  | 0.68 $\pm$ 0.23 | 3.63 $\pm$ 2.95 | 0.63 $\pm$ 0.19 | 0.44 $\pm$ 0.17   | 1.03 $\pm$ 0.13 | 0.92 $\pm$ 0.18 |
| Opto-GPR4    | 0.47 $\pm$ 0.18 | 0.30 $\pm$ 0.07  | 1.61 $\pm$ 1.00 | 1.84 $\pm$ 1.36 | 0.67 $\pm$ 0.25 | 0.50 $\pm$ 0.38   | 0.60 $\pm$ 0.12 | 0.36 $\pm$ 0.11 |
| Opto-GPR6    | 0.49 $\pm$ 0.26 | 0.25 $\pm$ 0.08  | 1.26 $\pm$ 0.84 | 1.09 $\pm$ 0.46 | 0.69 $\pm$ 0.21 | 0.51 $\pm$ 0.20   | 1.02 $\pm$ 0.08 | 0.83 $\pm$ 0.2  |
| Opto-GPR12   | 0.19 $\pm$ 0.08 | 0.20 $\pm$ 0.06  | 1.17 $\pm$ 0.58 | 0.76 $\pm$ 0.30 | 0.80 $\pm$ 0.28 | 0.58 $\pm$ 0.27   | 1.14 $\pm$ 0.19 | 0.95 $\pm$ 0.15 |
| Opto-GPR15   | 0.26 $\pm$ 0.14 | 0.21 $\pm$ 0.07  | 0.54 $\pm$ 0.29 | 0.65 $\pm$ 0.31 | 0.77 $\pm$ 0.25 | 0.73 $\pm$ 0.32   | 1.02 $\pm$ 0.13 | 0.77 $\pm$ 0.13 |
| Opto-GPR17   | 0.32 $\pm$ 0.10 | 0.27 $\pm$ 0.08  | 0.49 $\pm$ 0.25 | 0.60 $\pm$ 0.24 | 0.87 $\pm$ 0.34 | 0.54 $\pm$ 0.17   | 1.00 $\pm$ 0.08 | 0.83 $\pm$ 0.15 |
| Opto-GPR18   | 0.19 $\pm$ 0.06 | 0.22 $\pm$ 0.06  | 0.32 $\pm$ 0.07 | 0.80 $\pm$ 0.49 | 0.87 $\pm$ 0.28 | 0.56 $\pm$ 0.21   | 1.00 $\pm$ 0.12 | 1.14 $\pm$ 0.33 |
| Opto-GPR19   | 0.21 $\pm$ 0.08 | 0.24 $\pm$ 0.09  | 0.46 $\pm$ 0.23 | 0.55 $\pm$ 0.25 | 0.73 $\pm$ 0.22 | 0.63 $\pm$ 0.28   | 1.03 $\pm$ 0.14 | 0.90 $\pm$ 0.21 |
| Opto-GPR20   | 0.23 $\pm$ 0.03 | 0.49 $\pm$ 0.20  | 0.49 $\pm$ 0.20 | 0.86 $\pm$ 0.29 | 0.59 $\pm$ 0.15 | 0.64 $\pm$ 0.24   | 0.88 $\pm$ 0.10 | 0.74 $\pm$ 0.19 |
| Opto-GPR21   | 0.36 $\pm$ 0.07 | 10.36 $\pm$ 5.73 | 1.66 $\pm$ 1.36 | 0.57 $\pm$ 0.22 | 0.62 $\pm$ 0.19 | 0.64 $\pm$ 0.22   | 0.86 $\pm$ 0.08 | 0.99 $\pm$ 0.31 |
| Opto-GPR22   | 0.27 $\pm$ 0.09 | 0.41 $\pm$ 0.12  | 1.41 $\pm$ 0.74 | 1.27 $\pm$ 0.59 | 0.69 $\pm$ 0.18 | 0.86 $\pm$ 0.31   | 1.05 $\pm$ 0.29 | 2.45 $\pm$ 1.34 |
| Opto-GPR25   | 0.29 $\pm$ 0.08 | 0.40 $\pm$ 0.08  | 0.97 $\pm$ 0.61 | 1.44 $\pm$ 1.03 | 0.64 $\pm$ 0.22 | 0.45 $\pm$ 0.15   | 1.29 $\pm$ 0.17 | 0.98 $\pm$ 0.19 |
| Opto-GPR26   | 0.36 $\pm$ 0.10 | 0.41 $\pm$ 0.09  | 1.20 $\pm$ 0.84 | 0.54 $\pm$ 0.14 | 0.53 $\pm$ 0.17 | 0.44 $\pm$ 0.15   | 1.15 $\pm$ 0.11 | 0.86 $\pm$ 0.15 |
| Opto-GPR27   | 0.32 $\pm$ 0.10 | 0.23 $\pm$ 0.04  | 0.56 $\pm$ 0.20 | 0.59 $\pm$ 0.21 | 0.58 $\pm$ 0.17 | 0.41 $\pm$ 0.15   | 1.01 $\pm$ 0.06 | 0.89 $\pm$ 0.14 |
| Opto-GPR31   | 0.27 $\pm$ 0.11 | 0.57 $\pm$ 0.27  | 0.56 $\pm$ 0.19 | 0.79 $\pm$ 0.38 | 0.57 $\pm$ 0.21 | 0.51 $\pm$ 0.17   | 1.02 $\pm$ 0.10 | 0.80 $\pm$ 0.15 |
| Opto-GPR32   | 0.21 $\pm$ 0.07 | 4.89 $\pm$ 2.32  | 0.81 $\pm$ 0.38 | 0.67 $\pm$ 0.36 | 0.54 $\pm$ 0.16 | 0.44 $\pm$ 0.13   | 1.04 $\pm$ 0.09 | 0.66 $\pm$ 0.15 |
| Opto-GPR33   | 0.31 $\pm$ 0.14 | 0.46 $\pm$ 0.10  | 0.30 $\pm$ 0.07 | 2.45 $\pm$ 1.33 | 0.62 $\pm$ 0.16 | 30.56 $\pm$ 10.23 | 0.97 $\pm$ 0.09 | 0.65 $\pm$ 0.13 |
| Opto-GPR34   | 0.30 $\pm$ 0.11 | 0.30 $\pm$ 0.09  | 0.49 $\pm$ 0.16 | 0.50 $\pm$ 0.14 | 0.61 $\pm$ 0.27 | 0.65 $\pm$ 0.16   | 0.95 $\pm$ 0.09 | 0.81 $\pm$ 0.09 |
| Opto-GPR35   | 0.32 $\pm$ 0.11 | 0.22 $\pm$ 0.04  | 0.33 $\pm$ 0.08 | 0.47 $\pm$ 0.16 | 0.63 $\pm$ 0.16 | 0.64 $\pm$ 0.21   | 1.03 $\pm$ 0.10 | 0.74 $\pm$ 0.12 |
| Opto-GPR37   | 0.30 $\pm$ 0.08 | 0.25 $\pm$ 0.07  | 0.50 $\pm$ 0.11 | 0.41 $\pm$ 0.13 | 0.53 $\pm$ 0.12 | 0.47 $\pm$ 0.16   | 0.91 $\pm$ 0.08 | 0.91 $\pm$ 0.15 |
| Opto-GPR37L1 | 0.25 $\pm$ 0.08 | 0.31 $\pm$ 0.09  | 0.33 $\pm$ 0.11 | 0.33 $\pm$ 0.08 | 0.49 $\pm$ 0.13 | 0.50 $\pm$ 0.19   | 0.89 $\pm$ 0.11 | 1.06 $\pm$ 0.20 |
| Opto-GPR39   | 0.39 $\pm$ 0.19 | 0.51 $\pm$ 0.21  | 0.67 $\pm$ 0.21 | 0.35 $\pm$ 0.10 | 0.52 $\pm$ 0.15 | 0.63 $\pm$ 0.19   | 0.87 $\pm$ 0.05 | 0.92 $\pm$ 0.21 |
| Opto-GPR42   | 0.30 $\pm$ 0.14 | 1.05 $\pm$ 0.68  | 0.59 $\pm$ 0.21 | 0.49 $\pm$ 0.18 | 0.61 $\pm$ 0.15 | 0.60 $\pm$ 0.20   | 0.88 $\pm$ 0.05 | 1.22 $\pm$ 0.46 |
| Opto-GPR45   | 0.43 $\pm$ 0.16 | 0.56 $\pm$ 0.12  | 1.38 $\pm$ 0.60 | 0.71 $\pm$ 0.24 | 0.53 $\pm$ 0.13 | 0.48 $\pm$ 0.15   | 1.16 $\pm$ 0.18 | 0.85 $\pm$ 0.07 |
| Opto-GPR50   | 0.40 $\pm$ 0.16 | 0.43 $\pm$ 0.06  | 0.81 $\pm$ 0.20 | 0.86 $\pm$ 0.28 | 0.51 $\pm$ 0.15 | 0.34 $\pm$ 0.12   | 1.07 $\pm$ 0.19 | 1.07 $\pm$ 0.13 |
| Opto-GPR52   | 0.26 $\pm$ 0.09 | 0.30 $\pm$ 0.07  | 0.93 $\pm$ 0.49 | 0.65 $\pm$ 0.24 | 0.54 $\pm$ 0.15 | 0.45 $\pm$ 0.17   | 0.99 $\pm$ 0.07 | 0.88 $\pm$ 0.11 |
| Opto-GPR55   | 0.32 $\pm$ 0.12 | 0.46 $\pm$ 0.09  | 0.74 $\pm$ 0.20 | 0.66 $\pm$ 0.20 | 0.50 $\pm$ 0.15 | 0.40 $\pm$ 0.10   | 1.12 $\pm$ 0.10 | 0.75 $\pm$ 0.15 |
| Opto-GPR61   | 0.62 $\pm$ 0.17 | 6.11 $\pm$ 3.10  | 0.58 $\pm$ 0.20 | 0.66 $\pm$ 0.29 | 0.51 $\pm$ 0.15 | 0.62 $\pm$ 0.18   | 1.07 $\pm$ 0.12 | 0.82 $\pm$ 0.12 |
| Opto-GPR62   | 0.32 $\pm$ 0.09 | 0.51 $\pm$ 0.14  | 0.57 $\pm$ 0.22 | 0.77 $\pm$ 0.22 | 0.55 $\pm$ 0.16 | 0.60 $\pm$ 0.11   | 0.89 $\pm$ 0.04 | 0.83 $\pm$ 0.15 |
| Opto-GPR63   | 0.37 $\pm$ 0.11 | 0.51 $\pm$ 0.13  | 0.42 $\pm$ 0.12 | 0.44 $\pm$ 0.16 | 0.53 $\pm$ 0.18 | 0.78 $\pm$ 0.16   | 1.16 $\pm$ 0.28 | 0.74 $\pm$ 0.15 |
| Opto-GPR65   | 0.39 $\pm$ 0.15 | 0.53 $\pm$ 0.21  | 0.59 $\pm$ 0.19 | 0.67 $\pm$ 0.26 | 0.54 $\pm$ 0.14 | 0.58 $\pm$ 0.16   | 1.02 $\pm$ 0.05 | 0.80 $\pm$ 0.08 |
| Opto-GPR68   | 0.81 $\pm$ 0.45 | 0.78 $\pm$ 0.31  | 0.97 $\pm$ 0.27 | 2.61 $\pm$ 0.76 | 0.52 $\pm$ 0.15 | 0.58 $\pm$ 0.17   | 0.84 $\pm$ 0.05 | 1.02 $\pm$ 0.09 |
| Opto-GPR75   | 0.33 $\pm$ 0.14 | 0.30 $\pm$ 0.08  | 0.99 $\pm$ 0.45 | 1.28 $\pm$ 0.93 | 0.61 $\pm$ 0.18 | 0.62 $\pm$ 0.15   | 0.89 $\pm$ 0.09 | 0.86 $\pm$ 0.13 |
| Opto-GPR78   | 0.29 $\pm$ 0.05 | 0.65 $\pm$ 0.24  | 1.00 $\pm$ 0.34 | 5.05 $\pm$ 2.87 | 0.54 $\pm$ 0.12 | 35.1 $\pm$ 11.47  | 0.96 $\pm$ 0.13 | 1.38 $\pm$ 0.32 |
| Opto-GPR82   | 0.28 $\pm$ 0.07 | 0.50 $\pm$ 0.14  | 0.59 $\pm$ 0.19 | 0.54 $\pm$ 0.21 | 0.68 $\pm$ 0.17 | 0.71 $\pm$ 0.15   | 0.93 $\pm$ 0.14 | 1.31 $\pm$ 0.43 |
| Opto-GPR83   | 0.81 $\pm$ 0.18 | 0.67 $\pm$ 0.14  | 0.95 $\pm$ 0.19 | 0.86 $\pm$ 0.25 | 0.56 $\pm$ 0.22 | 0.51 $\pm$ 0.16   | 1.23 $\pm$ 0.26 | 1.09 $\pm$ 0.17 |

|             |             |             |             |             |             |             |             |             |
|-------------|-------------|-------------|-------------|-------------|-------------|-------------|-------------|-------------|
| Opto-GPR84  | 0.47 ± 0.09 | 1.02 ± 0.27 | 0.75 ± 0.23 | 0.67 ± 0.19 | 0.49 ± 0.16 | 0.45 ± 0.13 | 1.03 ± 0.14 | 1.04 ± 0.12 |
| Opto-GPR85  | 0.55 ± 0.15 | 1.10 ± 0.38 | 0.54 ± 0.16 | 0.43 ± 0.10 | 0.39 ± 0.10 | 0.49 ± 0.15 | 0.97 ± 0.13 | 0.72 ± 0.15 |
| Opto-GPR87  | 0.44 ± 0.09 | 0.53 ± 0.09 | 0.59 ± 0.18 | 0.66 ± 0.18 | 0.44 ± 0.12 | 0.45 ± 0.13 | 1.06 ± 0.05 | 1.00 ± 0.24 |
| Opto-GPR88  | 0.52 ± 0.08 | 0.44 ± 0.04 | 0.55 ± 0.17 | 1.88 ± 0.92 | 0.48 ± 0.15 | 0.55 ± 0.19 | 1.04 ± 0.06 | 1.02 ± 0.12 |
| Opto-GPR119 | 1.27 ± 0.45 | 0.87 ± 0.23 | 0.64 ± 0.17 | 0.67 ± 0.14 | 0.47 ± 0.09 | 0.52 ± 0.10 | 1.06 ± 0.14 | 0.90 ± 0.10 |
| Opto-GPR120 | 0.69 ± 0.18 | 0.46 ± 0.20 | 1.78 ± 0.79 | 1.59 ± 1.02 | 1.22 ± 0.54 | 0.80 ± 0.64 | 0.65 ± 0.24 | 0.77 ± 0.19 |
| Opto-GPR132 | 1.33 ± 0.43 | 0.66 ± 0.20 | 0.57 ± 0.18 | 0.55 ± 0.15 | 0.50 ± 0.11 | 0.69 ± 0.17 | 0.96 ± 0.09 | 0.89 ± 0.07 |
| Opto-GPR135 | 0.57 ± 0.12 | 6.78 ± 3.09 | 0.64 ± 0.09 | 1.11 ± 0.45 | 0.58 ± 0.14 | 0.55 ± 0.14 | 1.07 ± 0.10 | 1.09 ± 0.23 |
| Opto-GPR139 | 0.42 ± 0.09 | 0.43 ± 0.11 | 0.41 ± 0.08 | 0.53 ± 0.11 | 0.46 ± 0.11 | 0.55 ± 0.12 | 0.80 ± 0.03 | 1.18 ± 0.41 |
| Opto-GPR141 | 0.55 ± 0.13 | 0.37 ± 0.08 | 0.58 ± 0.15 | 0.45 ± 0.12 | 0.63 ± 0.16 | 0.68 ± 0.20 | 0.93 ± 0.08 | 1.28 ± 0.41 |
| Opto-GPR142 | 0.33 ± 0.12 | 0.30 ± 0.05 | 0.67 ± 0.29 | 0.46 ± 0.14 | 0.70 ± 0.17 | 0.91 ± 0.19 | 0.76 ± 0.04 | 0.95 ± 0.23 |
| Opto-GPR146 | 0.65 ± 0.15 | 1.06 ± 0.43 | 0.96 ± 0.21 | 1.62 ± 0.89 | 0.60 ± 0.17 | 0.58 ± 0.12 | 1.50 ± 0.45 | 1.09 ± 0.24 |
| Opto-GPR148 | 0.55 ± 0.13 | 0.78 ± 0.39 | 1.05 ± 0.29 | 0.68 ± 0.25 | 0.81 ± 0.4  | 0.58 ± 0.16 | 1.09 ± 0.07 | 0.95 ± 0.13 |
| Opto-GPR149 | 0.46 ± 0.10 | 1.01 ± 0.39 | 0.88 ± 0.3  | 0.69 ± 0.17 | 0.66 ± 0.28 | 0.54 ± 0.18 | 1.21 ± 0.15 | 0.91 ± 0.19 |
| Opto-GPR150 | 0.74 ± 0.26 | 1.05 ± 0.32 | 1.43 ± 0.31 | 1.26 ± 0.33 | 0.48 ± 0.12 | 0.70 ± 0.23 | 1.15 ± 0.10 | 0.73 ± 0.14 |
| Opto-GPR151 | 0.52 ± 0.09 | 0.75 ± 0.18 | 0.65 ± 0.17 | 1.17 ± 0.25 | 0.87 ± 0.49 | 0.49 ± 0.12 | 0.83 ± 0.06 | 0.90 ± 0.09 |
| Opto-GPR152 | 0.42 ± 0.08 | 0.48 ± 0.10 | 0.56 ± 0.17 | 0.74 ± 0.26 | 0.52 ± 0.10 | 0.68 ± 0.16 | 0.87 ± 0.13 | 0.88 ± 0.17 |
| Opto-GPR153 | 0.67 ± 0.15 | 0.67 ± 0.09 | 0.66 ± 0.21 | 0.69 ± 0.18 | 0.54 ± 0.12 | 0.75 ± 0.19 | 0.93 ± 0.10 | 1.10 ± 0.16 |
| Opto-GPR160 | 0.44 ± 0.04 | 0.58 ± 0.15 | 0.67 ± 0.26 | 0.86 ± 0.51 | 0.87 ± 0.13 | 0.83 ± 0.13 | 1.13 ± 0.12 | 1.02 ± 0.15 |
| Opto-GPR161 | 0.57 ± 0.08 | 0.67 ± 0.13 | 0.66 ± 0.21 | 0.65 ± 0.21 | 0.70 ± 0.18 | 0.74 ± 0.20 | 0.88 ± 0.11 | 1.04 ± 0.25 |
| Opto-GPR162 | 0.39 ± 0.10 | 0.57 ± 0.08 | 0.61 ± 0.13 | 0.88 ± 0.34 | 0.73 ± 0.14 | 0.95 ± 0.24 | 0.98 ± 0.06 | 1.68 ± 0.79 |
| Opto-GPR171 | 0.54 ± 0.09 | 0.54 ± 0.11 | 0.70 ± 0.10 | 0.73 ± 0.21 | 0.63 ± 0.12 | 0.74 ± 0.13 | 1.08 ± 0.06 | 2.19 ± 1.20 |
| Opto-GPR173 | 0.37 ± 0.09 | 0.38 ± 0.09 | 0.59 ± 0.14 | 0.57 ± 0.13 | 1.98 ± 1.18 | 0.80 ± 0.11 | 1.1 ± 0.06  | 1.46 ± 0.27 |
| Opto-GPR174 | 1.01 ± 0.23 | 0.87 ± 0.19 | 1.28 ± 0.69 | 0.68 ± 0.16 | 0.55 ± 0.17 | 0.74 ± 0.09 | 1.14 ± 0.26 | 1.02 ± 0.23 |
| Opto-GPR176 | 0.53 ± 0.12 | 0.64 ± 0.12 | 0.96 ± 0.2  | 0.72 ± 0.13 | 0.67 ± 0.22 | 0.65 ± 0.14 | 0.91 ± 0.06 | 1.02 ± 0.12 |
| Opto-GPR182 | 0.71 ± 0.18 | 0.75 ± 0.32 | 0.70 ± 0.11 | 1.72 ± 0.96 | 0.52 ± 0.15 | 0.56 ± 0.11 | 0.98 ± 0.07 | 1.13 ± 0.12 |
| Opto-GPR183 | 0.43 ± 0.09 | 0.65 ± 0.07 | 0.88 ± 0.16 | 2.02 ± 1.01 | 0.76 ± 0.23 | 0.68 ± 0.18 | 0.96 ± 0.08 | 0.91 ± 0.11 |

**Supplementary Table 8. Substitutions in fourteen Class A GPCRs.** Receptors with at least one non-conservative substitution in the E/DRY motif and at least one non-conservative substitution in conserved contacts involved in active and inactive states (3x46, 6x37 and 7x53) are listed. Non-conservative substitutions are highlighted in red. Residues not found in non-orphan Class A GPCRs are highlighted with a star (\*). Colors denote side chain chemistry (blue: aliphatic, orange: aromatic, red: basic, green: acidic, purple: polar, grey: other).

| Receptor          | E/DRY motif  |           |              | Conserved contacts |           |          |
|-------------------|--------------|-----------|--------------|--------------------|-----------|----------|
|                   | 3x49         | 3x50      | 3x51         | 3x46               | 6x37      | 7x53     |
| GPR27             | T*           | R         | Y            | V                  | F         | C*       |
| GPR62             | A            | R         | Y            | L                  | P         | Y        |
| GPR75             | H            | R         | L*           | I                  | C         | Y        |
| GPR84             | G            | R         | Y            | I                  | C         | Y        |
| GPR85             | T*           | R         | Y            | I                  | F         | C*       |
| GPR141            | T*           | R         | Y            | I                  | N         | F        |
| GPR148            | H            | T         | Y            | I                  | H*        | P*       |
| GPR149            | N            | F*        | Y            | V                  | A         | V*       |
| GPR151            | V            | C         | F            | V                  | L         | F*       |
| GPR152            | D            | R         | C            | L                  | A         | C*       |
| GPR153            | H            | R         | M            | L                  | T         | L        |
| GPR162            | H            | R         | M            | L                  | S         | I        |
| GPR173            | T*           | R         | Y            | I                  | F         | C*       |
| Class A consensus | Acidic (E/D) | Basic (R) | Aromatic (Y) | Aliphatic          | Aliphatic | Aromatic |

**Supplementary Table 9. Oligonucleotide PCR primers utilized in this study.** Restriction sites are underlined where applicable.

| Number | Sequence                                                    |
|--------|-------------------------------------------------------------|
| 1      | GATCGCGGCCGCACCATGAGGACTCTGAACACCTCTGC                      |
| 2      | GATCGGTACCTCAGGTTGGGTGCTGACCG                               |
| 3      | GATCGCGGCCGCACCATGGATCCACTGAATCTGTCCTG                      |
| 4      | GATCGGTACCTCAGCAGTGGAGGATCTTCAGG                            |
| 5      | GATCGCGGCCGCACCATGAACACTTCAGCCCCAC                          |
| 6      | GATCAAGCTTTCAGCATTTGGCGGGAGGG                               |
| 7      | GATCGCGGCCGCACCATGAATAACTCAACAACTCCTCTAACAAATA              |
| 8      | GATCAAGCTTTTACCTTGTAGCGCCTATGTTC                            |
| 9      | CACTATAGGGAGACACAAGCTGGCTAGC                                |
| 10     | GCTAGCCAGCTTGTGTCTCCCTATAGTG                                |
| 11     | AATGATACCGCGGGACCCACGCTCA                                   |
| 12     | TGAGCGTGGGTCCC GCGGTATCATT                                  |
| 13     | GAGGATTGGGAAGAGAATAGCAGGCATGC                               |
| 14     | GCATGCCTGCTATTCTCTTCCCAATCCTC                               |
| 15     | GATCTGGACGAAGAACATCAGGGGCTCG                                |
| 16     | CGAGCCCCTGATGTTCTTCGTCCAGATC                                |
| 17     | GATATTGCTGAAGAACTTGGCGGCGAATGG                              |
| 18     | CCATTCGCCGCCAAGTTCTTCAGCAATATC                              |
| 19     | TATTGGGCGCTCTTGCCTTCCTCGCTCA                                |
| 20     | TGAGCGAGGAAGCGCAAGAGCGCCAATA                                |
| 21     | CAGATCGGCGGCCCTTAAGAATTCCACCACACTGGACTAGT                   |
| 22     | GTCTAGGGCGCGCCGGCAGGCGCCACTTGGCTG                           |
| 23     | CAAATTGGGCGGCCCTGCGGTGAGCAAGGGCGAGGAGGATAAC                 |
| 24     | GTCTAGGGCGCGCCCTTGTACAGCTCGTCCATGCCGCC                      |
| 25     | GCCCAGAAGATCGAGTGGCACGAGGGCAGCAGCGGCGATAGCCTCATGAACGGGACCGA |
| 26     | CTCGAAGATATCGTTCAGGCCGCCGCTGCTGCCGCGAATACCAGGCAGAAGATGT     |
| 27     | CAGATCATCGATACAGAAACCAGCCAAGTGGC                            |
| 28     | CAGATCATCGATGCGGAACTGCTTGTTCATCATG                          |
| 29     | GATCGCTAGCATGGCTTCCAAGGTG                                   |
| 30     | GATCTCTAGAATTACTGCTCGTTC                                    |

## Supplementary References

1. Engler, C. & Marillonnet, S. Golden Gate cloning. *Methods Mol. Biol.* **1116**, 119-131 (2014).
2. Atwood, B. K., Lopez, J., Wager-Miller, J., Mackie, K. & Straiker, A. Expression of G protein-coupled receptors and related proteins in HEK293, AtT20, BV2, and N18 cell lines as revealed by microarray analysis. *BMC Genomics* **12**, 14 (2011).
3. Airan, R. D., Thompson, K. R., Fenno, L. E., Bernstein, H. & Deisseroth, K. Temporally precise in vivo control of intracellular signalling. *Nature* **458**, 1025-1029 (2009).
4. Schmidt, J. *et al.* Selective orthosteric free fatty acid receptor 2 (FFA2) agonists: identification of the structural and chemical requirements for selective activation of FFA2 versus FFA3. *J. Biol. Chem.* **286**, 10628-10640 (2011).
5. Cusack, N. J. & Hourani, S. M. 5'-N-ethylcarboxamidoadenosine: a potent inhibitor of human platelet aggregation. *Br. J. Pharmacol.* **72**, 443-447 (1981).
6. Werner, P., Hussy, N., Buell, G., Jones, K. A. & North, R. A. D2, D3, and D4 dopamine receptors couple to G protein-regulated potassium channels in *Xenopus* oocytes. *Mol. Pharmacol.* **49**, 656-661 (1996).
7. Arnt, J., Bogeso, K. P., Hyttel, J. & Meier, E. Relative dopamine D1 and D2 receptor affinity and efficacy determine whether dopamine agonists induce hyperactivity or oral stereotypy in rats. *Pharmacol. Toxicol.* **62**, 121-130 (1988).
8. Pan, Z. Z. & Williams, J. T. Muscarine hyperpolarizes a subpopulation of neurons by activating an M2 muscarinic receptor in rat nucleus raphe magnus in vitro. *J. Neurosci.* **14**, 1332-1338 (1994).
9. Benson, J. A. Electrophysiological pharmacology of the nicotinic and muscarinic cholinergic responses of isolated neuronal somata from locust thoracic ganglia. *J. Exp. Biol.* **170**, 203-233 (1992).
10. Lebois, E. P. *et al.* Discovery and characterization of novel subtype-selective allosteric agonists for the investigation of M(1) receptor function in the central nervous system. *ACS Chem. Neurosci.* **1**, 104-121 (2010).
